# Supplementary material
Source: Springer Nature journal article supplement (https://www.springermedizin.de/resource/supplementary/12913_2011_1690_MOESM3_ESM.pdf/9528742)
Supplement: MOESM3 [file 9528742]

Files Identified  
N = 4225  
Electronic Databases = 2440  
Content Expert Files = 1314  
Bibliographies = 471

Duplicates  
N = 1261

Unique Articles Identified  
N = 2964  
Electronic Databases = 1531  
Content Expert Files = 1314  
Bibliographies = 471

Abstracts Excluded  
N = 2452

Full Text Pulled  
N = 512  
Electronic Databases = 158  
Content Expert Files = 260  
Bibliographies = 263

Ineligible Papers  
N = 298  
Reasons for Exclusion  
213 Not a validated measure  
47 Hypothetical scenarios or attitudinal evaluations  
17 Irrelevant to outpatient visits or telemedicine consultations  
16 Interventions that stipulate elements of the referral process

Eligible Papers  
N = 214  
Electronic Databases = 61  
Content Expert Files = 108  
Bibliographies = 140

Unique Metrics  
N = 244
